# Supplementary material
Source: publisher site journal article supplement (https://www.dovepress.com/article/537251)
Supplement: Supplementary file 1 [file 537251%20Revised%20Supplementary%20Table%201.docx]

**Supplementary Table 1 Prescription drugs**

| **Category** | **Classification** | **Generic name** | **Administration route** | **Generic codea** |
| --- | --- | --- | --- | --- |
| Antidepressants | SSRI | Fluvoxamine maleate | Internal | 1179039 |
| Antidepressants | SSRI | Paroxetine hydrochloride hydrate | Internal | 1179041 |
| Antidepressants | SSRI | Sertraline hydrochloride | Internal | 1179046 |
| Antidepressants | SSRI | Escitalopram oxalate | Internal | 1179054 |
| Antidepressants | SNRI | Milnacipran hydrochloride | Internal | 1179040 |
| Antidepressants | SNRI | Duloxetine hydrochloride | Internal | 1179052 |
| Antidepressants | SNRI | Venlafaxine hydrochloride | Internal | 1179055 |
| Antidepressants | NaSSA | Mirtazapine | Internal | 1179051 |
| Antidepressants | TCA | Clomipramine hydrochloride | Internal | 1174002 |
| Antidepressants | TCA | Clomipramine hydrochloride | Injection | 1174401 |
| Antidepressants | TCA | Lofepramine hydrochloride | Internal | 1174004 |
| Antidepressants | TCA | Trimipramine maleate | Internal | 1174005 |
| Antidepressants | TCA | Imipramine hydrochloride | Internal | 1174006 |
| Antidepressants | TCA | Amoxapine | Internal | 1179001 |
| Antidepressants | TCA | Amitriptyline hydrochloride | Internal | 1179002 |
| Antidepressants | TCA | Nortriptyline hydrochloride | Internal | 1179004 |
| Antidepressants | TCA | Maprotiline hydrochloride | Internal | 1179008 |
| Antidepressants | TCA | Dosulepin hydrochloride | Internal | 1179027 |
| Antidepressants | TCA | Mianserin hydrochloride | Internal | 1179033 |
| Antidepressants | TCA | Setiptiline maleate | Internal | 1179034 |
| Antidepressants | SARI | Trazodone hydrochloride | Internal | 1179037 |
| Antidepressants | Other antidepressant | Sulpiride | Internal | 1179016 |
| Antidepressants | Other antidepressant | Sulpiride | Internal | 2329009 |
| Anxiolytics | Benzodiazepine anxiolytic | Oxazolam | Internal | 1124013 |
| Anxiolytics | Benzodiazepine anxiolytic | Cloxazolam | Internal | 1124014 |
| Anxiolytics | Benzodiazepine anxiolytic | Clorazepate dipotassium | Internal | 1124015 |
| Anxiolytics | Benzodiazepine anxiolytic | Diazepam | Internal | 1124017 |
| Anxiolytics | Benzodiazepine anxiolytic | Diazepam | Injection | 1124402 |
| Anxiolytics | Benzodiazepine anxiolytic | Prazepam | Internal | 1124018 |
| Anxiolytics | Benzodiazepine anxiolytic | Fludiazepam | Internal | 1124019 |
| Anxiolytics | Benzodiazepine anxiolytic | Bromazepam | Internal | 1124020 |
| Anxiolytics | Benzodiazepine anxiolytic | Bromazepam | Internal | 1121001 |
| Anxiolytics | Benzodiazepine anxiolytic | Medazepam | Internal | 1124021 |
| Anxiolytics | Benzodiazepine anxiolytic | Lorazepam | Internal | 1124022 |
| Anxiolytics | Benzodiazepine anxiolytic | Alprazolam | Internal | 1124023 |
| Anxiolytics | Benzodiazepine anxiolytic | Flutazolam | Internal | 1124024 |
| Anxiolytics | Benzodiazepine anxiolytic | Mexazolam | Internal | 1124025 |
| Anxiolytics | Benzodiazepine anxiolytic | Tofisopam | Internal | 1124026 |
| Anxiolytics | Benzodiazepine anxiolytic | Flutoprazepam | Internal | 1124027 |
| Anxiolytics | Benzodiazepine anxiolytic | Chlordiazepoxide | Internal | 1124028 |
| Anxiolytics | Benzodiazepine anxiolytic | Ethyl Loflazepate | Internal | 1124029 |
| Anxiolytics | Benzodiazepine anxiolytic | Clotiazepam | Internal | 1179012 |
| Anxiolytics | Benzodiazepine anxiolytic | Etizolam | Internal | 1179025 |
| Anxiolytics | 5-HT1A partial agonist | Tandospirone citrate | Internal | 1129008 |
| Anxiolytics | Antiallergic anxiolytic | Hydroxyzine hydrochloride | Internal | 1179005 |
| Anxiolytics | Antiallergic anxiolytic | Hydroxyzine hydrochloride | Injection | 1179401 |
| Anxiolytics | Antiallergic anxiolytic | Hydroxyzine pamoate | Internal | 1179019 |
| Anxiolytics | Other anxiolytic | Gamma oryzanol | Internal | 2900002 |
| Hypnotics | Benzodiazepine hypnotic | Estazolam | Internal | 1124001 |
| Hypnotics | Benzodiazepine hypnotic | Flurazepam hydrochloride | Internal | 1124002 |
| Hypnotics | Benzodiazepine hypnotic | Nitrazepam | Internal | 1124003 |
| Hypnotics | Benzodiazepine hypnotic | Nimetazepam | Internal | 1124004 |
| Hypnotics | Benzodiazepine hypnotic | Haloxazolam | Internal | 1124005 |
| Hypnotics | Benzodiazepine hypnotic | Triazolam | Internal | 1124007 |
| Hypnotics | Benzodiazepine hypnotic | Flunitrazepam | Internal | 1124008 |
| Hypnotics | Benzodiazepine hypnotic | Flunitrazepam | Injection | 1124400 |
| Hypnotics | Benzodiazepine hypnotic | Brotizolam | Internal | 1124009 |
| Hypnotics | Benzodiazepine hypnotic | Lormetazepam | Internal | 1124010 |
| Hypnotics | Benzodiazepine hypnotic | Quazepam | Internal | 1124030 |
| Hypnotics | Benzodiazepine hypnotic | Rilmazafone hydrochloride hydrate | Internal | 1129006 |
| Hypnotics | Non-benzodiazepine hypnotic (Z-drugs) | Zopiclone | Internal | 1129007 |
| Hypnotics | Non-benzodiazepine hypnotic (Z-drugs) | Zolpidem tartrate | Internal | 1129009 |
| Hypnotics | Non-benzodiazepine hypnotic (Z-drugs) | Eszopiclone | Internal | 1129010 |
| Hypnotics | Melatonin receptor agonist | Ramelteon | Internal | 1190016 |
| Hypnotics | Orexin receptor antagonist | Suvorexant | Internal | 1190023 |
| Hypnotics | Other hypnotic | Amobarbital | Internal | 1125001 |
| Hypnotics | Other hypnotic | Barbital | Internal | 1125002 |
| Hypnotics | Other hypnotic | Bromovalerylurea | Internal | 1121001 |
| Hypnotics | Other hypnotic | Chloral hydrate | Internal | 1123001 |
| Hypnotics | Other hypnotic | Chloral hydrate | External | 1123700 |
| Hypnotics | Other hypnotic | Phenobarbital | Internal | 1125003 |
| Hypnotics | Other hypnotic | Phenobarbital | Internal | 1125004 |
| Hypnotics | Other hypnotic | Pentobarbital calcium | Internal | 1125006 |
| Hypnotics | Other hypnotic | Secobarbital sodium | Internal | 1125401 |
| Hypnotics | Other hypnotic | Tricolors sodium | Internal | 1129004 |
| Mood Stabilizer | Mood stabilizer | Carbamazepine | Internal | 1139002 |
| Mood Stabilizer | Mood stabilizer | Sodium valproate | Internal | 1139004 |
| Mood Stabilizer | Mood stabilizer | Lamotrigine | Internal | 1139009 |
| Mood Stabilizer | Mood stabilizer | Lithium carbonate | Internal | 1179017 |
| Antipsychotics | Antipsychotics | Chlorpromazine hydrochloride | Internal | 1171001 |
| Antipsychotics | Antipsychotics | Chlorpromazine hydrochloride | Injection | 1171400 |
| Antipsychotics | Antipsychotics | Chlorpromazine phenolphthalein | Internal | 1171005 |
| Antipsychotics | Antipsychotics | Chlorpromazine-promethazine-phenobarbital | Internal | 1179100 |
| Antipsychotics | Antipsychotics | Chlorpromazine-promethazine-phenobarbital | Internal | 1179101 |
| Antipsychotics | Antipsychotics | Perphenazine benzoate | Internal | 1172004 |
| Antipsychotics | Antipsychotics | Perphenazine | Internal | 1172006 |
| Antipsychotics | Antipsychotics | Perphenazine | Internal | 1172007 |
| Antipsychotics | Antipsychotics | Perphenazine hydrochloride | Injection | 1172402 |
| Antipsychotics | Antipsychotics | Trifluoperazine | Internal | 1172008 |
| Antipsychotics | Antipsychotics | Fluphenazine maleate | Internal | 1172009 |
| Antipsychotics | Antipsychotics | Perphenazine maleate | Internal | 1172013 |
| Antipsychotics | Antipsychotics | Propericiazine | Internal | 1172005 |
| Antipsychotics | Antipsychotics | Prochlorperazine maleate | Internal | 1172010 |
| Antipsychotics | Antipsychotics | Levomepromazine maleate | Internal | 1172014 |
| Antipsychotics | Antipsychotics | Levomepromazine hydrochloride | Injection | 1172403 |
| Antipsychotics | Antipsychotics | Prochlorperazine | Injection | 1172404 |
| Antipsychotics | Antipsychotics | Fluphenazine decanoate | Injection | 1172405 |
| Antipsychotics | Antipsychotics | Pipamperone hydrochloride | Internal | 1179006 |
| Antipsychotics | Antipsychotics | Oxypertine | Internal | 1179011 |
| Antipsychotics | Antipsychotics | Spiperone | Internal | 1179015 |
| Antipsychotics | Antipsychotics | Carpipramine | Internal | 1179029 |
| Antipsychotics | Antipsychotics | Carpipramine | Internal | 1179031 |
| Antipsychotics | Antipsychotics | Sulpiride | Injection | 1179403 |
| Antipsychotics | Antipsychotics | Sulpiride | Injection | 2329401 |
| Antipsychotics | Antipsychotics | Pimozide | Injection | 1179022 |
| Antipsychotics | Antipsychotics | Haloperidol | Internal | 1179020 |
| Antipsychotics | Antipsychotics | Haloperidol | Injection | 1179404 |
| Antipsychotics | Antipsychotics | Haloperidol decanoate | Injection | 1179406 |
| Antipsychotics | Antipsychotics | Zotepine | Internal | 1179024 |
| Antipsychotics | Antipsychotics | Timiperone | Internal | 1179026 |
| Antipsychotics | Antipsychotics | Timiperone | Injection | 1179405 |
| Antipsychotics | Antipsychotics | Bromperidol | Internal | 1179028 |
| Antipsychotics | Antipsychotics | Clocapramine hydrochloride hydrate | Internal | 1179030 |
| Antipsychotics | Antipsychotics | Sultopride hydrochloride | Internal | 1179032 |
| Antipsychotics | Antipsychotics | Mosapramine hydrochloride | Internal | 1179035 |
| Antipsychotics | Antipsychotics | Nemonapride | Internal | 1179036 |
| Antipsychotics | Antipsychotics | Risperidone | Internal | 1179038 |
| Antipsychotics | Antipsychotics | Risperidone | Injection | 1179407 |
| Antipsychotics | Antipsychotics | Quetiapine fumarate | Internal | 1179042 |
| Antipsychotics | Antipsychotics | Perospirone hydrochloride hydrate | Internal | 1179043 |
| Antipsychotics | Antipsychotics | Olanzapine | Internal | 1179044 |
| Antipsychotics | Antipsychotics | Olanzapine | Injection | 1179408 |
| Antipsychotics | Antipsychotics | Aripiprazole | Internal | 1179045 |
| Antipsychotics | Antipsychotics | Aripiprazole hydrate | Injection | 1179410 |
| Antipsychotics | Antipsychotics | Blonanserin | Internal | 1179048 |
| Antipsychotics | Antipsychotics | Blonanserin | External | 1179700 |
| Antipsychotics | Antipsychotics | Clozapine | Internal | 1179049 |
| Antipsychotics | Antipsychotics | Paliperidone | Internal | 1179053 |
| Antipsychotics | Antipsychotics | Paliperidone palmitate | Injection | 1179409 |
| Antipsychotics | Antipsychotics | Asenapine maleate | Internal | 1179056 |
| Antipsychotics | Antipsychotics | Tiapribe | Internal | 1190004 |
| ADHD medication | ADHD medication | Atomoxetine hydrochloride | Internal | 1179050 |
| ADHD medication | ADHD medication | Guanfacine hydrochloride | Internal | 1179057 |
| ADHD medication | ADHD medication | Lisdexamfetamine mesilate | Internal | 1179059 |

**Note:**aSeven upper digits of the Japanese National Health Insurance drug list.

**Abbreviations:** ADHD, attention-deficit/hyperactivity disorder; 5-HT1A, 5-hydroxytryptamine receptor 1A; ICD-10, International Classification of Diseases, Tenth Revision; NaSSA, noradrenergic and specific serotonergic antidepressant; SARI, serotonin antagonist and reuptake inhibitor; SNRI, serotonin noradrenaline reuptake inhibitor; SSRI, selective serotonin reuptake inhibitor; TCA, tricyclic or tetracyclic antidepressant.
